# Supplementary material
Source: publisher figshare collection journal article supplement (https://acs.figshare.com/ndownloader/files/4407367)
Supplement: Supplementary file 1 [file 4407367]

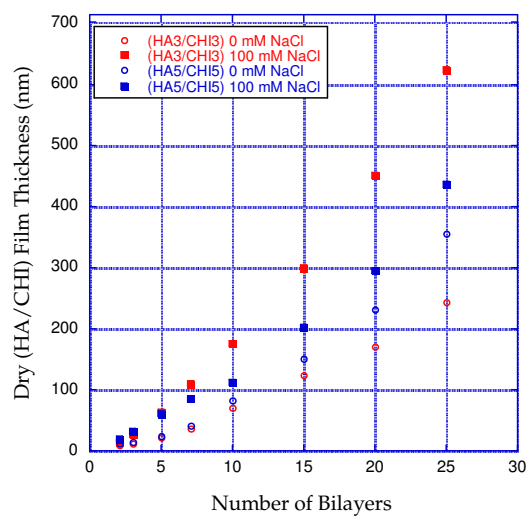

**Figure S1.** (HA/CHI) film thickness as a function of the number of bilayers, for all cases of pH (3.0 versus 5.0) and ionic concentration (0 versus 100 mM NaCl) variations.

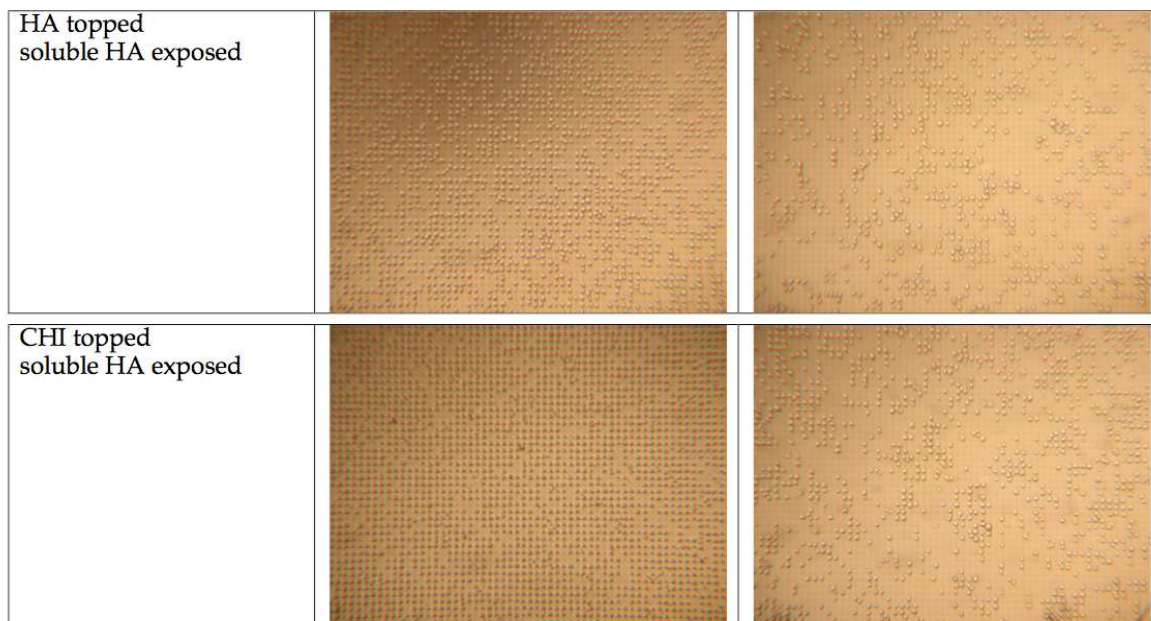

**Figure S2.** Array micrographs where B cells were seeded onto patterned HA or CHI-topped films built with and without 100mM NaCl, respectively, and soluble HA was added to competitively bind with CD44 or CHI.

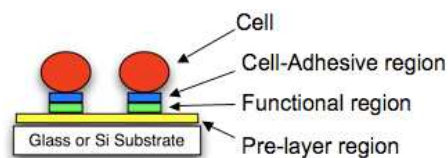

| Region        | Components                                                                                                                 | Thickness (nm) |
|---------------|----------------------------------------------------------------------------------------------------------------------------|----------------|
| Cell-Adhesive | (+) Chitosan (CHI)<br>(-) Hyaluronic acid (HA)                                                                             | ~ 20 - 57      |
| Functional    | (+) Fluorescein labeled poly(allylamine) (FITC-PAH)<br>(-) $\text{Fe}_3\text{O}_4$ nanoparticles (MNP) (13 nm in diameter) | ~ 190          |
| Pre-layer     | (+) Poly(diallyldimethylammonium chloride) (PDAC)<br>(-) Poly(sodium 4-styrene sulfonate) (SPS)                            | ~ 55 - 59      |

Note: NOT discrete layers: interpenetrated layers

**Figure S3.** Schematic of the multilayer patterned array – B cell system.
